# Supplementary material for: Overexpression of the Brassica rapa bZIP Transcription Factor, BrbZIP-S, Increases the Stress Tolerance in Nicotiana benthamiana
Source: MDPI journal article supplement (doi:10.3390/biology12040517), 2023-03-29
Supplement: s1 [file s1]

Supplementary Materials

# Overexpression of the *Brassica rapa* bZIP Transcription Factor, *BrbZIP-S*, Increases the Stress Tolerance in *Nicotiana benthamiana*

**Table S1.** Primer sequences for cloning and qPCR analysis.

|                     | Name        | Sequences                  |
|---------------------|-------------|----------------------------|
| Full-length cloning | BrbZIP-S-F  | CACCATGGACTCGTCGTCGTC      |
|                     | BrbZIP-S-R  | ATACAGTAACGCATCAGAAGA      |
| qPCR analysis       | NbP5CS1-F   | ATCTTGATGGCAAGGCTTGTGCTG   |
|                     | NbP5CS1-R   | AAGCTGAGCTGAGGTTACGTCCAA   |
|                     | NbP5CS2-F   | CCTGTTCTTGGTCATGCTGATGGT   |
|                     | NbP5CS2-R   | GCATTGCAGGCTGCTGGATAATCA   |
|                     | NbP5CR-F    | TGGAGAAGGCTGGATTTCTGTGGTA  |
|                     | NbP5CR-R    | TTCCGGCTGGTCCACCACTTA      |
|                     | NbProDH1-F  | AGCTATGTGCGTAGCCTCTT       |
|                     | NbProDH1-R  | AGGTGCTACAACAGATGGAGAAAG   |
|                     | NbProDH2-F  | GGTCTATTATATTGTAGCACCTTTGT |
|                     | NbProDH2-R  | CATTTCGGCTCCACTTTGGGTA     |
|                     | NbP5CDH-F   | TCCAAGTGCCCGAAACATGGTCTA   |
|                     | NbP5CDH-R   | GAAACCTCAGGCAAGCCAAGCATA   |
|                     | NbV-inv 1-F | GCCACCCACCATTTCCATT        |
|                     | NbV-inv 1-R | GGAGAGAAGAATGCCGGAGA       |
|                     | NbV-inv 2-F | TGAAGTGGACAAAGCAGCAC       |
|                     | NbV-inv 2-R | CTCGGCCATCAGTTCCTTTG       |
|                     | NbEF1-F     | CACGCATTGCTTGCTTTCA        |
|                     | NbEF1-R     | TCCATCTTGTTACAGCAGCAAATC   |
